# Supplementary material for: Molecular behavior of hybrid gas hydrate nucleation: separation of soluble H2S from mixed gas
Source: Royal Society of Chemistry journal article supplement (doi:10.1039/d1cp05302g), 2022-01-01

**Supporting information for**

**Molecular behavior of hybrid gas hydrate nucleation: separation of soluble H<sub>2</sub>S  
from mixed gas**

Yi Lu<sup>1</sup>, Chengyang Yuan, Xin lv<sup>2</sup>, Qingping Li<sup>2</sup>, Lei Yang<sup>1\*</sup>, Lunxiang Zhang<sup>1</sup>, Jiafei  
Zhao<sup>1</sup>, and Yongchen Song<sup>1\*</sup>

<sup>1</sup> *Key Laboratory of Ocean Energy Utilization and Energy Conservation of Ministry of Education,  
Dalian University of Technology, Dalian, 116024, China*

<sup>2</sup> *State Key Laboratory of Natural Gas Hydrate, Beijing, China, 100028*

\*Corresponding Authors: leiyang@dlut.edu.cn (Lei Yang); [songyc@dlut.edu.cn](mailto:songyc@dlut.edu.cn) (Yongchen Song)

**Table S1** Potential parameters for water, methane, H<sub>2</sub>S.

| Model                | $\epsilon$ (kJ/mol) | $\sigma$ (Å) | $q_H/q_C/q_O$ | $d_{OC}$ (Å) | $d_{OH}$ (Å) | $d_{OM}$ (Å) | $\angle H-O-H$ |
|----------------------|---------------------|--------------|---------------|--------------|--------------|--------------|----------------|
| TIP4p/ice            | 0.8822              | 3.1668       | 0.5897        |              | 0.9572       | 0.1577       | 104.52         |
| OPLS/CH <sub>4</sub> | 1.2300              | 3.7300       |               |              |              |              |                |
| TIP4p/S              | 2.23659             | 3.6900       | 0.6610        |              |              |              |                |
| TIP4p/MS             | 0.0                 | 0.0          | -1.2170       |              |              |              |                |
| TIP4p/HS             | 0.0                 | 0.0          | 0.2780        |              |              |              |                |

**Table S2** Nucleation time for all hydrate simulation systems.

| system/index                         | 1   | 2   | 3   | 4   | 5   | 6   | 7   | 8   | 9   | 10  |
|--------------------------------------|-----|-----|-----|-----|-----|-----|-----|-----|-----|-----|
| 0%H <sub>2</sub> S/CH <sub>4</sub>   | 215 | 126 | 90  | 246 | 157 | NAN | 934 | 215 | NAN | 129 |
| 10%H <sub>2</sub> S/CH <sub>4</sub>  | 83  | 54  | 95  | 163 | 118 | 33  | 556 | 126 | 95  | 33  |
| 30%H <sub>2</sub> S/CH <sub>4</sub>  | 48  | 129 | 101 | 61  | 70  | 74  | 51  | 48  | 129 | 101 |
| 50%H <sub>2</sub> S/CH <sub>4</sub>  | 52  | 16  | 41  | 23  | 25  | 40  | 19  | 36  | 22  | 19  |
| 70%H <sub>2</sub> S/CH <sub>4</sub>  | 9   | 12  | 8   | 16  | 31  | 15  | 7   | 8   | 17  | 27  |
| 90%H <sub>2</sub> S/CH <sub>4</sub>  | 1   | 8   | 10  | 1   | 7   | 6   | 3   | 59  | 1   | 9   |
| 100%H <sub>2</sub> S/CH <sub>4</sub> | 1   | 6   | 10  | 16  | 7   | 5   | 7   | 19  | 24  | 1   |

**Table S3** Average induction time and nucleation rate for all hydrate simulation systems.

| System (H <sub>2</sub> S/CH <sub>4</sub> ) | 0%    | 10%   | 30%   | 50%    | 70%    | 90%    | 100%   |
|--------------------------------------------|-------|-------|-------|--------|--------|--------|--------|
| Induction time (ns)                        | 411.2 | 135.6 | 82.1  | 29.3   | 15.0   | 10.5   | 9.7    |
| Nucleation rate ( $\times 10^{25}$ )       | 0.462 | 7.139 | 11.65 | 32.457 | 62.418 | 87.436 | 94.386 |

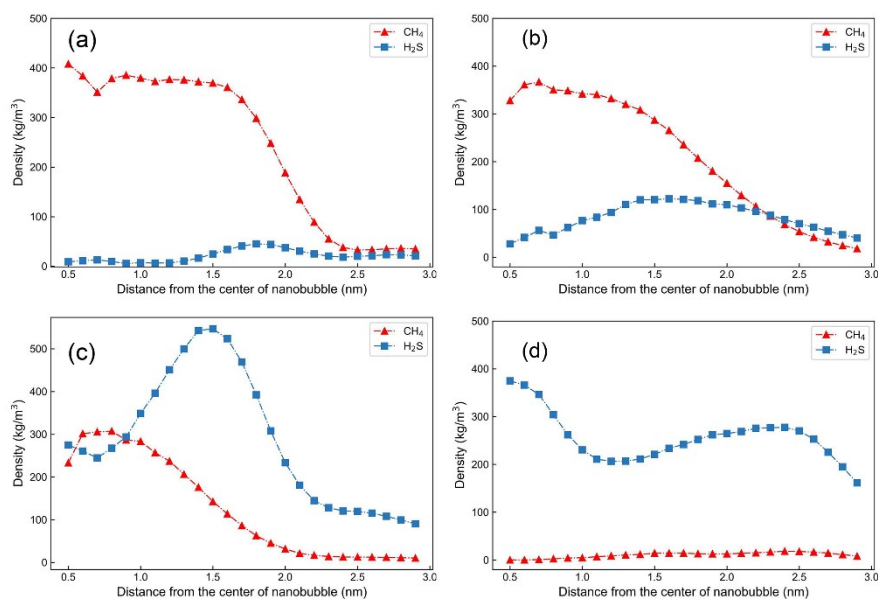

**Figure S1** Radial density distribution of the two types of guest molecules in the nanobubble. (a)-(d) are the results for 10%, 30%, 70%, 90% H<sub>2</sub>S system, respectively. The red and blue lines represent the results for CH<sub>4</sub> and H<sub>2</sub>S.

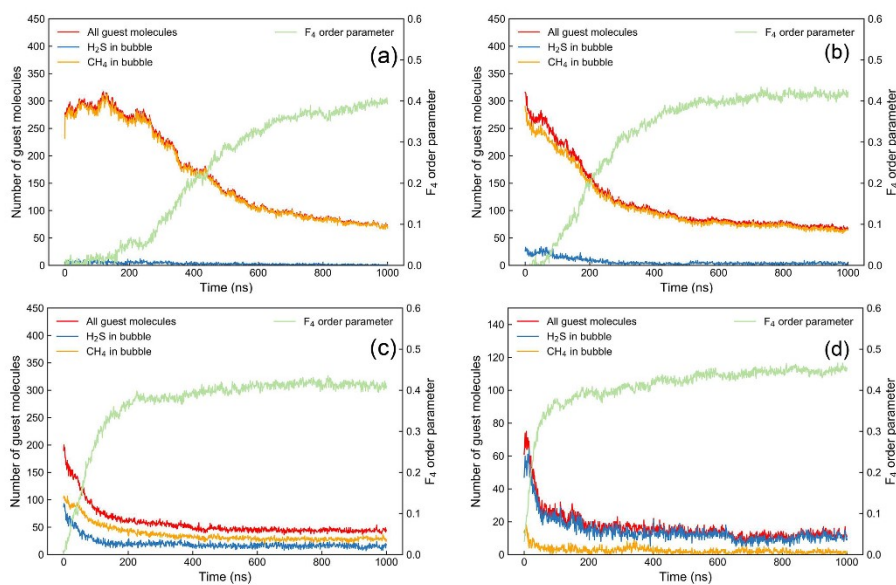

**Figure S2** Evolution of the number of guest molecules in nanobubble and F<sub>4</sub> order parameter for (a) 10%, (b) 30%, (c) 70%, (d) 90% H<sub>2</sub>S/CH<sub>4</sub> system.

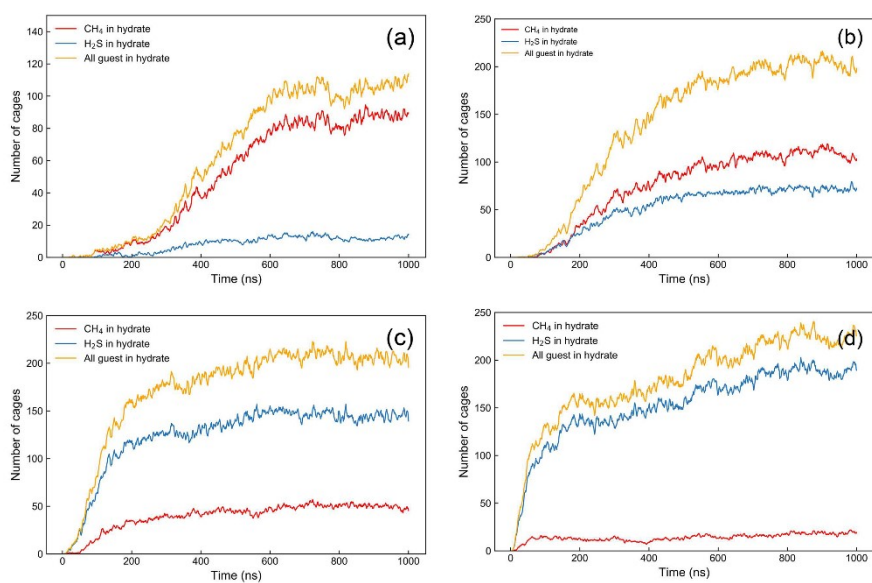

**Figure S3** Evolution of cages occupied by mixed gas for (a) 10%, (b) 30%, (c) 70%, (d) 90% H<sub>2</sub>S/CH<sub>4</sub> system.

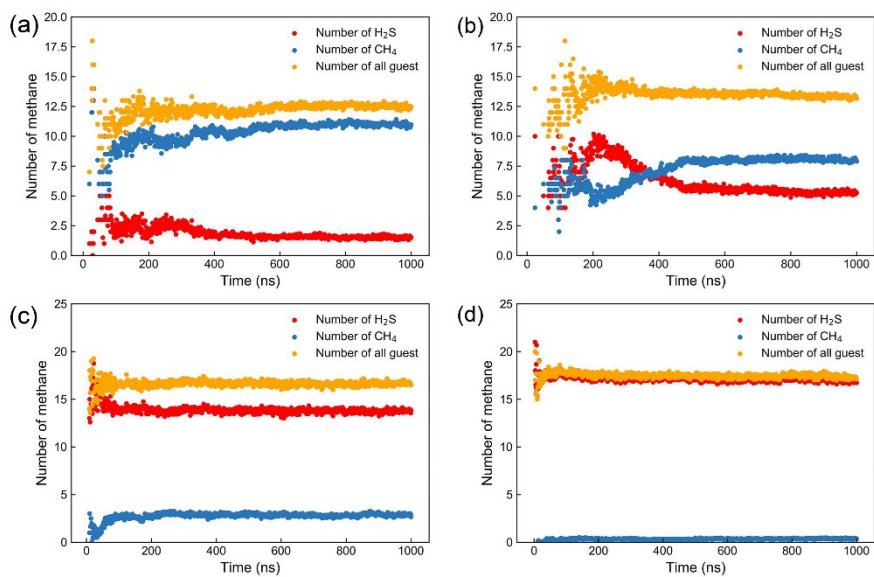

**Figure S4** Example of typical evolution of the average number of guest molecules surrounding the cages for (a) 10%, (b) 30%, (c) 70%, (d) 90% H<sub>2</sub>S/CH<sub>4</sub> system.

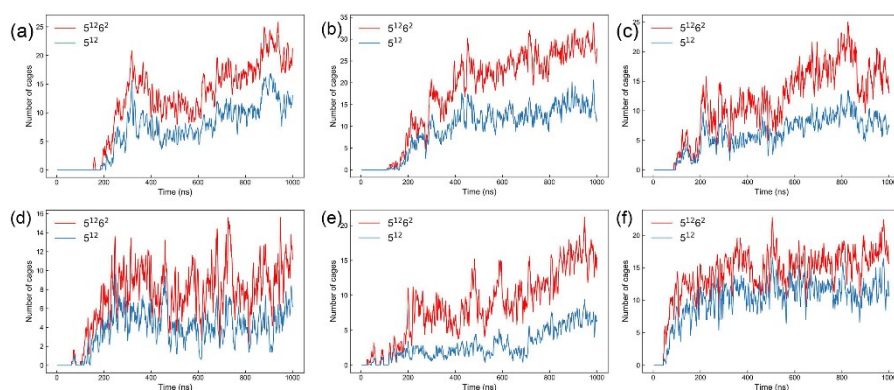

**Figure S5** Example of typical evolution of the average number of  $5^{12}$  and  $5^{12}6^2$  cages in SI and SII crystal hydrate cluster for (a) 10%, (b) 30%, (c) 70%, (d) 90%, (f) 100%  $H_2S/CH_4$  system.

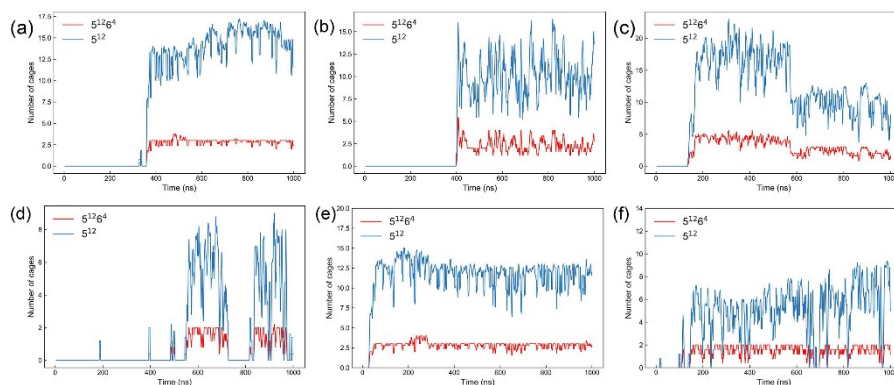

**Figure S6** Example of typical evolution of the average number of  $5^{12}$  and  $5^{12}6^4$  cages in SI and SII crystal hydrate cluster for (a) 10%, (b) 30%, (c) 70%, (d) 90%, (f) 100%  $H_2S/CH_4$  system.

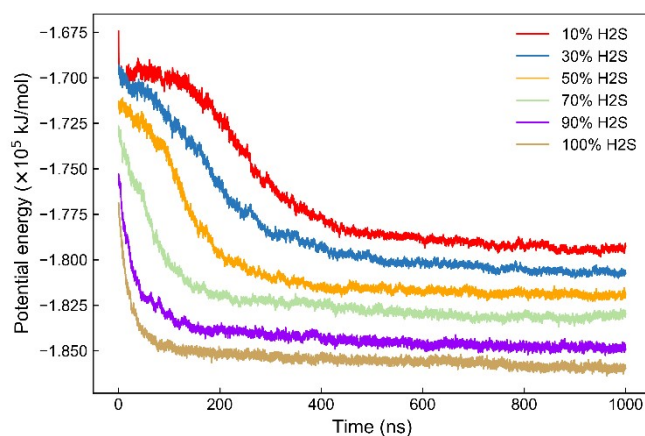

**Figure S7** Typical potential energy evolutions for seven different initial  $H_2S/CH_4$  proportion.

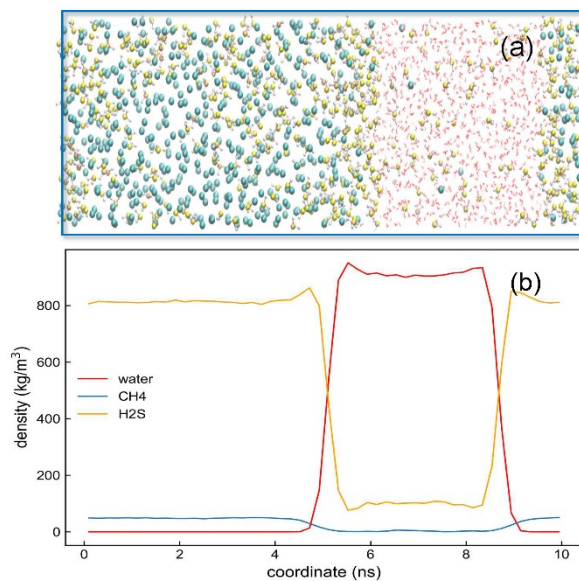

**Figure S8** Typical final configuration and density distribution results for the simulation to calculate solubility with a flat interface. (a) typical configuration; (b) density distribution for the last 10 ns of the simulation.

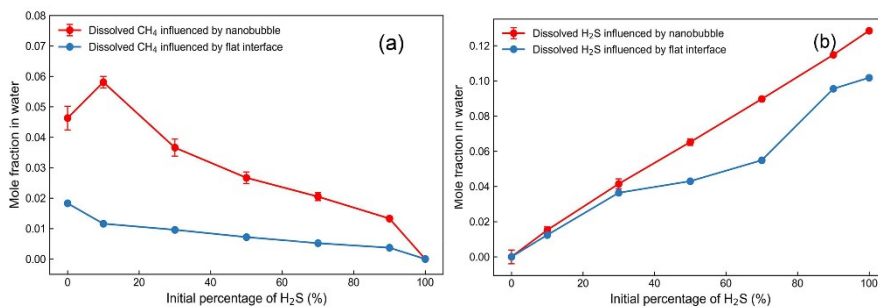

**Figure S9** Solubility results for simulation with a flat interface at 250 K and 500 bar. (a) for methane; (b) for H<sub>2</sub>S.

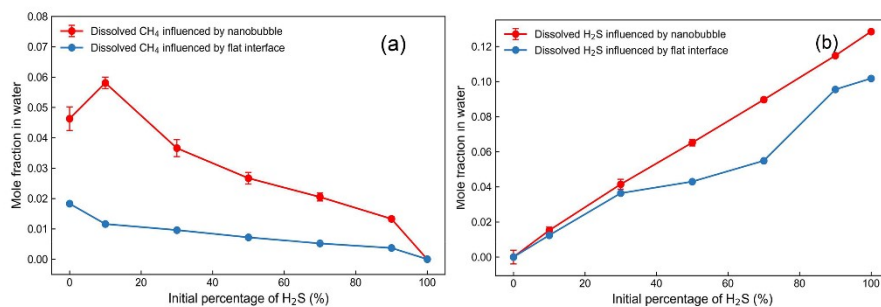

Supplement: d1cp05302g1.pdf [file d1cp05302g1.pdf]
